# Supplementary material
Source: PubMed Central journal article supplement (PMC3271269)

**Fig. S6.** c-Myc overexpression partially rescues RhoA suppression by miR-34a in a stable miR-34a A498 cell line

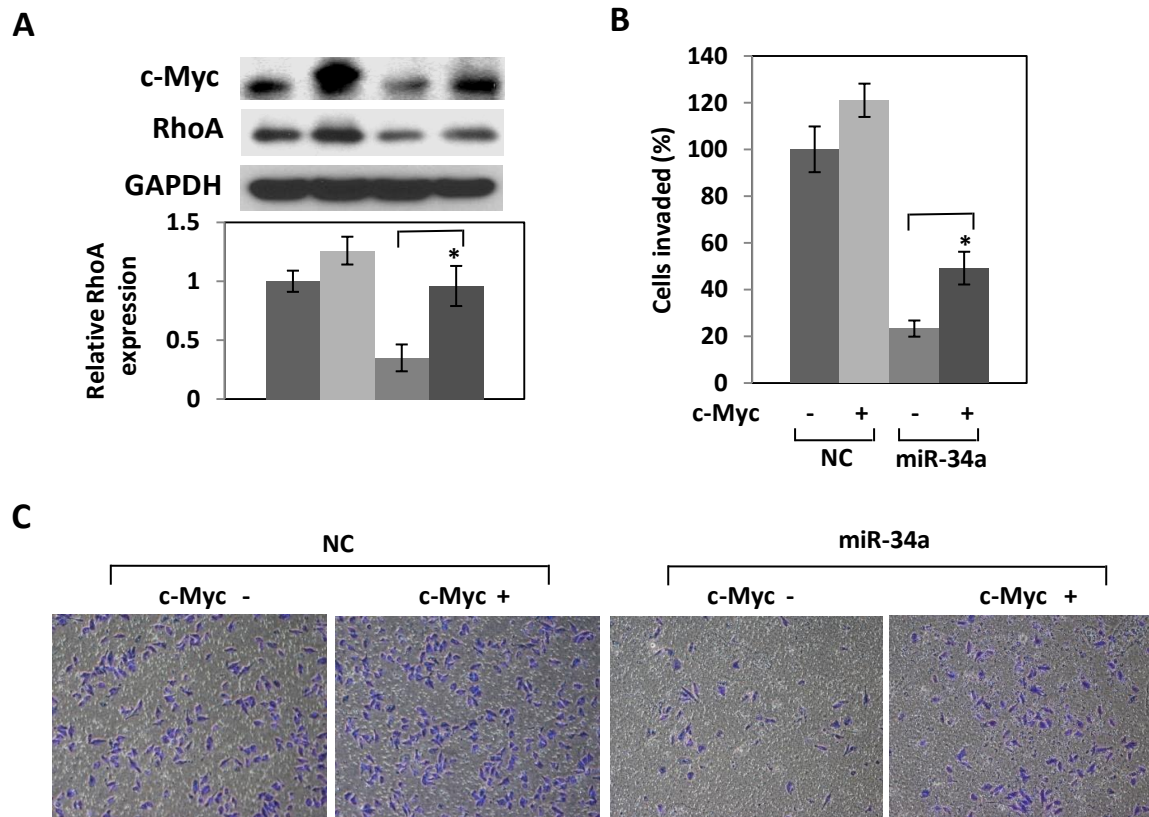

Supplement: supp_bgr286_BGR286_Fig_S6.pdf [file supp_bgr286_BGR286_Fig_S6.pdf]
