# Supplementary material
Source: PubMed Central journal article supplement (PMC3271269)

**Figure S1.** miR-34a expression in transiently transfected renal cancer cells

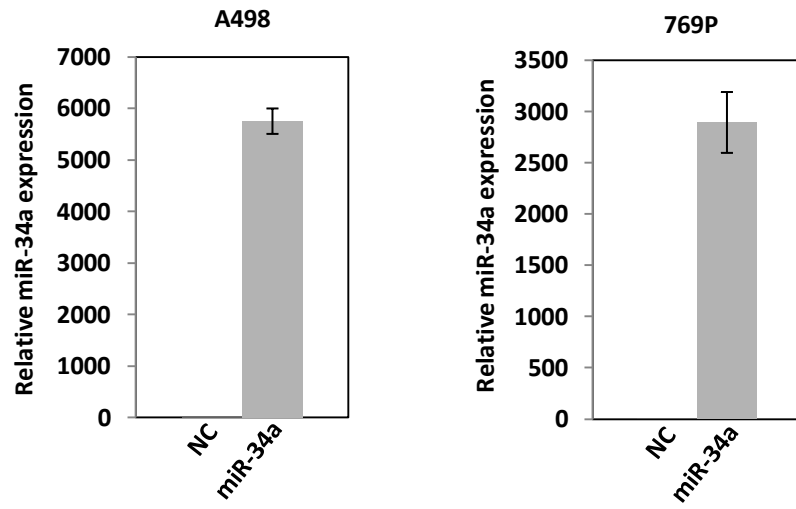

Supplement: supp_bgr286_BGR286_Fig_S1.pdf [file supp_bgr286_BGR286_Fig_S1.pdf]

**Figure S3.** Relative protein expression in transiently transfected renal cancer cells

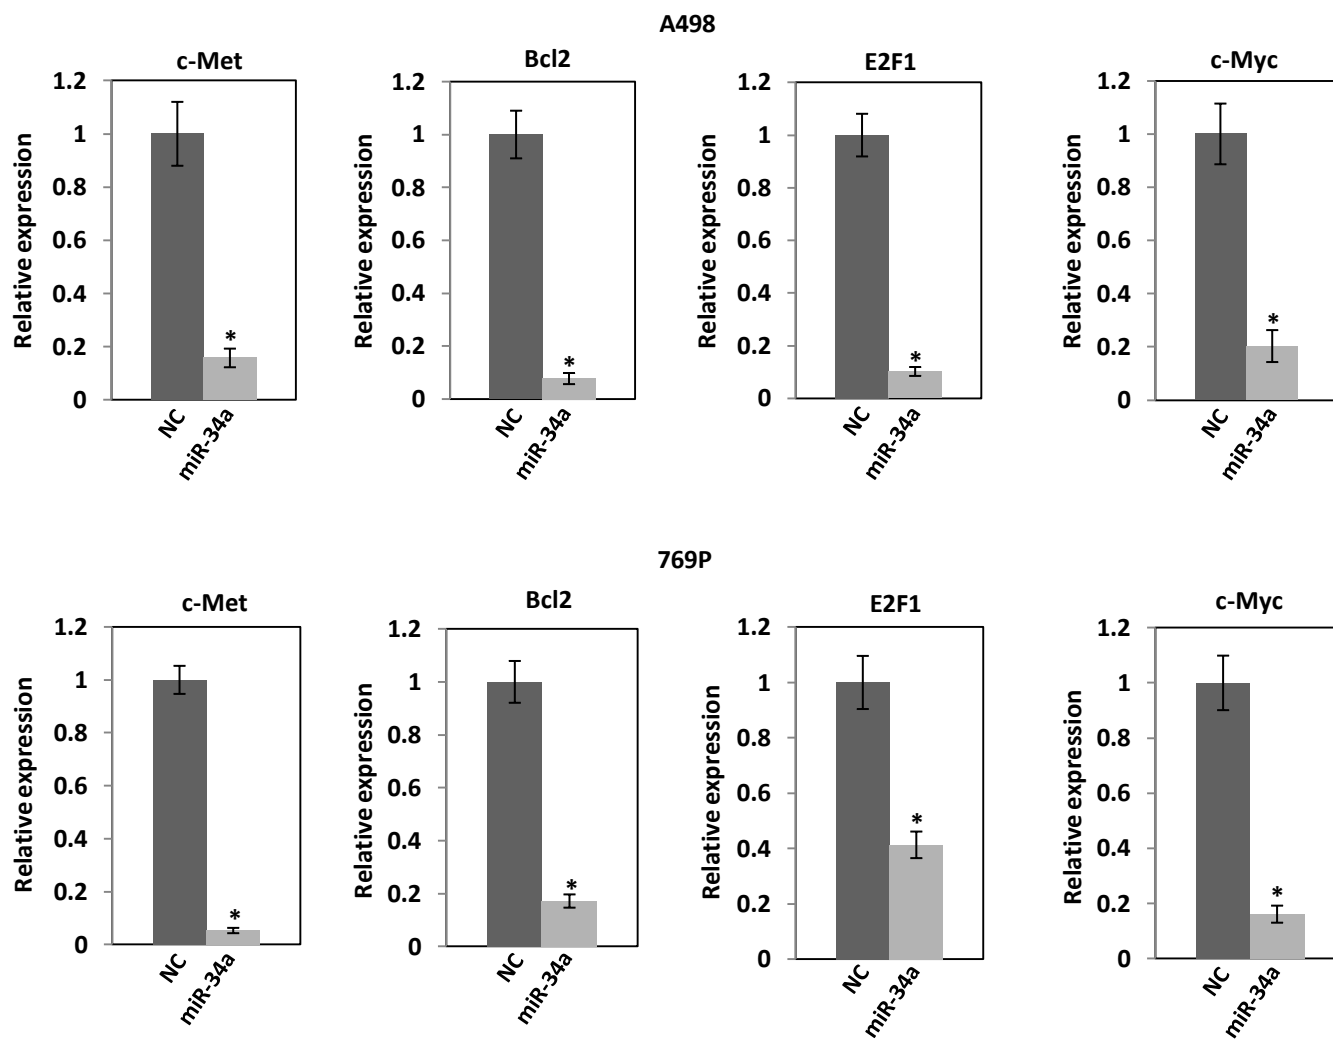

Supplement: supp_bgr286_BGR286_Fig_S3.pdf [file supp_bgr286_BGR286_Fig_S3.pdf]

**Figure S4.** miR-34a inhibits invasion of 769P cells

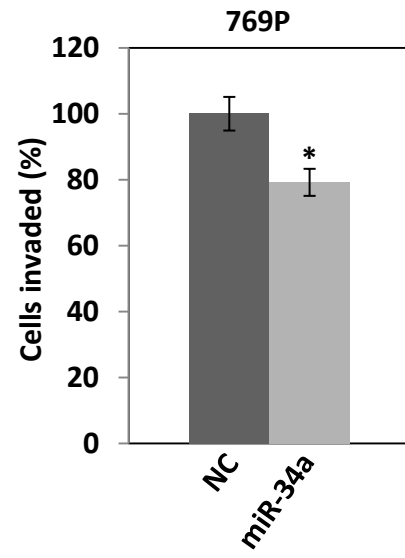

Supplement: supp_bgr286_BGR286_Fig_S4.pdf [file supp_bgr286_BGR286_Fig_S4.pdf]

**Fig. S5.** miR-34a expression in stably transfected A498 renal cells

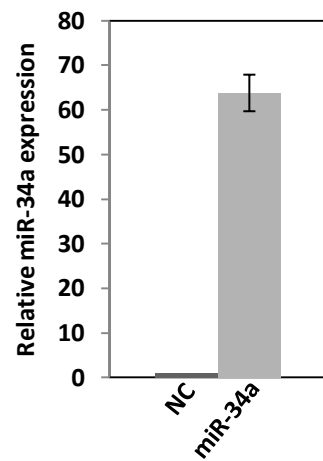

Supplement: supp_bgr286_BGR286_Fig_S5.pdf [file supp_bgr286_BGR286_Fig_S5.pdf]
